# Supplementary material for: Preparation and properties of CA/ATP-g-CDs gel fibers for simultaneous detection and adsorption of methylene blue
Source: Royal Society of Chemistry journal article supplement (doi:10.1039/c8ra01324a), 2018-01-01
Supplement: c8ra01324a1.pdf [file c8ra01324a1.pdf]

**Figure S1. The Sol-Gel effect of CA/ ATP composite**

| Sample | CaCl <sub>2</sub> (wt%) | ATP (g) | CA(g) | Sol-Gel  |
|--------|-------------------------|---------|-------|----------|
| 1      | 0                       | 0.5     | 0     | Slo      |
| 2      | 1%                      | 0.3     | 0.5   | Sol      |
| 3      | 2%                      | 0.5     | 1     | Sol      |
| 4      | 3%                      | 0.5     | 1.5   | Weak gel |
| 5      | 3%                      | 0.5     | 2     | Gel      |
| 6      | 4%                      | 0.5     | 2     | Gel      |
| 7      | 4%                      | 1       | 2.5   | Gel      |
| 8      | 4%                      | 2       | 2.5   | Weak gel |

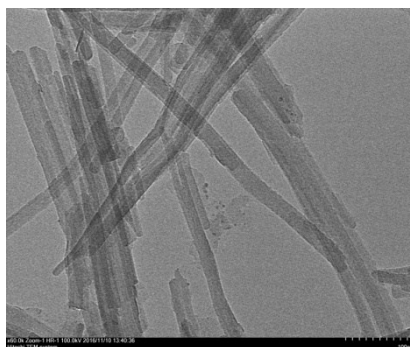

Figure S2. TEM of ATP
